# Supplementary material for: Characterizing the Assessment and Management of Vitamin D Levels in Patients with Osteoporosis in Clinical Practice: A Chart Review Initiative
Source: Hindawi journal article supplement (doi:10.1155/2015/312952), 2015-01-01
Supplement: f1 [file 312952.f1.pdf]

## ADVANCE

## Practice Enhancement Program

Patient number: \_\_\_\_\_

Inclusion Criteria: ☐ Treated to prevent fracture and last seen between November 2008 and April 2009

## Patient Information:

Gender: ☐ Male ☐ Female Age: \_\_\_\_\_ years Height: \_\_\_\_\_ cm Weight: \_\_\_\_\_ kgRace: ☐ Asian ☐ Black ☐ Caucasian ☐ OtherLength of treatment to prevent fracture: ☐ <1 year ☐ 1-5 years ☐ >5 yearsFragility fracture after age 40: ☐ Spine ☐ Hip ☐ Wrist ☐ Other: \_\_\_\_\_ ☐ NoneSystemic glucocorticoid therapy of >3 months' duration: ☐ Yes ☐ No

Most recent bone mineral density (BMD) measurement (lowest T-score): \_\_\_\_\_

Date of most recent BMD measurement: \_\_\_\_\_

Site of lowest T-score: ☐ Lumbar spine ☐ Total hip ☐ Femoral neck ☐ Trochanter ☐ Other: \_\_\_\_\_

Significant change in BMD between most recent and previous scans: \*1

|              |                                   |                                   |                               |                              |
|--------------|-----------------------------------|-----------------------------------|-------------------------------|------------------------------|
| Lumbar spine | <input type="checkbox"/> Increase | <input type="checkbox"/> Decrease | <input type="checkbox"/> None | <input type="checkbox"/> N/A |
| Total hip    | <input type="checkbox"/> Increase | <input type="checkbox"/> Decrease | <input type="checkbox"/> None | <input type="checkbox"/> N/A |
| Femoral neck | <input type="checkbox"/> Increase | <input type="checkbox"/> Decrease | <input type="checkbox"/> None | <input type="checkbox"/> N/A |
| Trochanter   | <input type="checkbox"/> Increase | <input type="checkbox"/> Decrease | <input type="checkbox"/> None | <input type="checkbox"/> N/A |

Serum vitamin D availability: ☐ Available in chart ☐ Test had to be scheduled → Date scheduled: \_\_\_\_\_

Serum vitamin D level (nmol/L): \_\_\_\_\_ Month measurement taken: \_\_\_\_\_

If serum vitamin D level is not available, please consider arranging to have patient tested for serum 25(OH)D level (assay L606 on schedule of laboratory fees<sup>2</sup>). Note: there is no charge to the patient for this assay.

## Current Osteoporosis Medications

|                                                                  |                                                                                                             |
|------------------------------------------------------------------|-------------------------------------------------------------------------------------------------------------|
| None <input type="checkbox"/>                                    |                                                                                                             |
| <b>Bisphosphonate</b>                                            |                                                                                                             |
| Alendronate (Fosamax®)                                           | <input type="checkbox"/> 5 mg/day <input type="checkbox"/> 10 mg/day <input type="checkbox"/> 70 mg/week    |
| Alendronate/cholecalciferol (Fosavance®)                         | <input type="checkbox"/> 70 mg/2800 IU per week <input type="checkbox"/> 70 mg/5600 IU per week             |
| Etidronate/calcium carbonate (Didrocal®)                         | <input type="checkbox"/> 400 mg/1250 mg                                                                     |
| Risedronate (Actonel®)                                           | <input type="checkbox"/> 5 mg/day <input type="checkbox"/> 35 mg/week <input type="checkbox"/> 150 mg/month |
| Risedronate – calcium carbonate (Actonel® Plus Calcium)          | <input type="checkbox"/> 35 mg/week – 1250 mg/day (six days/week)                                           |
| Zoledronic acid (Aclasta)                                        | <input type="checkbox"/> 5 mg/100 mL yearly infusion                                                        |
| <b>Hormone therapy</b>                                           |                                                                                                             |
| Estradiol-17β (Climara®, Estraderm®, Estradot®)                  | <input type="checkbox"/> 25 µg/day <input type="checkbox"/> 37.5 µg/day <input type="checkbox"/> 50 µg/day  |
|                                                                  | <input type="checkbox"/> 75 µg/day <input type="checkbox"/> 100 µg/day                                      |
| Estradiol-17β (micronized) (Estrace®)                            | <input type="checkbox"/> 0.5 mg/day <input type="checkbox"/> 1 mg/day <input type="checkbox"/> 2 mg/day     |
| Estradiol-17β – norethindrone acetate/estradiol-17β (Estracomb®) | <input type="checkbox"/> 50 µg/day – 250 µg/50 µg per day                                                   |
| Norethindrone acetate/ethinyl estradiol (femHRT™)                | <input type="checkbox"/> 0.5 mg/2.5 µg per day <input type="checkbox"/> 1 mg/5 µg per day                   |
| <b>Parathyroid hormone</b>                                       |                                                                                                             |
| Teriparatide (Forteo®)                                           | <input type="checkbox"/> 20 µg/day                                                                          |
| <b>Calcitonin</b>                                                |                                                                                                             |
| Salmon calcitonin (Miacalcin® NS)                                | <input type="checkbox"/> 200 IU/day                                                                         |
| <b>Selective estrogen receptor modulator</b>                     |                                                                                                             |
| Raloxifene (Evista®)                                             | <input type="checkbox"/> 60 mg/day                                                                          |
| <b>Supplementation</b>                                           |                                                                                                             |
| Calcium supplement                                               | <input type="checkbox"/> None <input type="checkbox"/> <500 mg/day <input type="checkbox"/> 500-600 mg/day  |
|                                                                  | <input type="checkbox"/> 601-1199 mg/day <input type="checkbox"/> ≥1200 mg/day                              |
| Vitamin D supplement                                             | <input type="checkbox"/> None <input type="checkbox"/> <2800 IU/week                                        |
|                                                                  | <input type="checkbox"/> 2800-5599 IU/week <input type="checkbox"/> ≥5600 IU/week                           |
| Other (please specify): _____ Dose: _____                        |                                                                                                             |

N/A = not applicable

The least significant change between two BMD measurements is 2.8 times the site-specific precision error for a single measurement.<sup>1</sup> The patient's most recent BMD report should note whether a significant change in BMD was observed at any of the sites.

## ADVANCE

## Practice Enhancement Program

**Evaluation of Current Regimen**

Is this patient's BMD satisfactory (i.e., has there been no significant decrease in any measurement between the most recent and previous scans)?<sup>3</sup> ☐ Yes ☐ No

Are this patient's serum vitamin D levels adequate?

☐ Yes ☐ No

If you answered "No" to one of the above questions, does this patient require any changes to their medication?

☐ Yes ☐ No

**Implications of Various Serum Vitamin D Levels<sup>4</sup>**

|               |               |
|---------------|---------------|
| <50 nmol/L    | Deficiency    |
| 50-79 nmol/L  | Insufficiency |
| 80-250 nmol/L | Sufficiency   |

**If patient requires changes to medication, please complete the section below and consider arranging an appointment in order to implement proposed changes.**

**Changes to Regimen (if applicable)**

Please indicate what changes you intend to make, if applicable (please check all that apply):

|                                                                        |                                                                                                                                                                                                                                                                                                                                                                                         |                                                                                                                                                                                                       |                                                                                          |
|------------------------------------------------------------------------|-----------------------------------------------------------------------------------------------------------------------------------------------------------------------------------------------------------------------------------------------------------------------------------------------------------------------------------------------------------------------------------------|-------------------------------------------------------------------------------------------------------------------------------------------------------------------------------------------------------|------------------------------------------------------------------------------------------|
| <input type="checkbox"/> <b>A.</b> Increase dose of current medication | <input type="checkbox"/> <b>B.</b> Change to another medication: <ul style="list-style-type: none"> <li><input type="checkbox"/> Bisphosphonate</li> <li><input type="checkbox"/> Parathyroid hormone</li> <li><input type="checkbox"/> Calcitonin</li> <li><input type="checkbox"/> Hormone therapy</li> <li><input type="checkbox"/> Selective estrogen receptor modulator</li> </ul> | <input type="checkbox"/> <b>C.</b> Add or increase dose of supplement: <ul style="list-style-type: none"> <li><input type="checkbox"/> Calcium</li> <li><input type="checkbox"/> Vitamin D</li> </ul> | <input type="checkbox"/> <b>D.</b> Provide counselling regarding lifestyle modifications |
|------------------------------------------------------------------------|-----------------------------------------------------------------------------------------------------------------------------------------------------------------------------------------------------------------------------------------------------------------------------------------------------------------------------------------------------------------------------------------|-------------------------------------------------------------------------------------------------------------------------------------------------------------------------------------------------------|------------------------------------------------------------------------------------------|

Would this patient benefit from combination therapy with vitamin D? ☐ Yes ☐ No

Please check medication(s) and supplement(s) to be included in proposed regimen:

|                                                                  |                                                                   |                                                 |                                         |
|------------------------------------------------------------------|-------------------------------------------------------------------|-------------------------------------------------|-----------------------------------------|
| <b>Bisphosphonate</b>                                            |                                                                   |                                                 |                                         |
| Alendronate (Fosamax®)                                           | <input type="checkbox"/> 5 mg/day                                 | <input type="checkbox"/> 10 mg/day              | <input type="checkbox"/> 70 mg/week     |
| Alendronate/cholecalciferol (Fosavance®)                         | <input type="checkbox"/> 70 mg/2800 IU per week                   | <input type="checkbox"/> 70 mg/5600 IU per week |                                         |
| Etidronate/calcium carbonate (Didrocal®)                         | <input type="checkbox"/> 400 mg/1250 mg                           |                                                 |                                         |
| Risedronate (Actonel®)                                           | <input type="checkbox"/> 5 mg/day                                 | <input type="checkbox"/> 35 mg/week             | <input type="checkbox"/> 150 mg/month   |
| Risedronate – calcium carbonate (Actonel® Plus Calcium)          | <input type="checkbox"/> 35 mg/week – 1250 mg/day (six days/week) |                                                 |                                         |
| Zoledronic acid (Aclasta)                                        | <input type="checkbox"/> 5 mg/100 mL yearly infusion              |                                                 |                                         |
| <b>Hormone therapy</b>                                           |                                                                   |                                                 |                                         |
| Estradiol-17β (Climara®, Estraderm®, Estradot®)                  | <input type="checkbox"/> 25 µg/day                                | <input type="checkbox"/> 37.5 µg/day            | <input type="checkbox"/> 50 µg/day      |
| Estradiol-17β (micronized) (Estrace®)                            | <input type="checkbox"/> 0.5 mg/day                               | <input type="checkbox"/> 75 µg/day              | <input type="checkbox"/> 100 µg/day     |
| Estradiol-17β – norethindrone acetate/estradiol-17β (Estracomb®) | <input type="checkbox"/> 50 µg/day – 250 µg/50 µg per day         | <input type="checkbox"/> 1 mg/day               | <input type="checkbox"/> 2 mg/day       |
| Norethindrone acetate/ethinyl estradiol (femHRT™)                | <input type="checkbox"/> 0.5 mg/2.5 µg per day                    | <input type="checkbox"/> 1 mg/5 µg per day      |                                         |
| <b>Parathyroid hormone</b>                                       |                                                                   |                                                 |                                         |
| Teriparatide (Forteo®)                                           | <input type="checkbox"/> 20 µg/day                                |                                                 |                                         |
| <b>Calcitonin</b>                                                |                                                                   |                                                 |                                         |
| Salmon calcitonin (Miacalcin® NS)                                | <input type="checkbox"/> 200 IU/day                               |                                                 |                                         |
| <b>Selective estrogen receptor modulator</b>                     |                                                                   |                                                 |                                         |
| Raloxifene (Evista®)                                             | <input type="checkbox"/> 60 mg/day                                |                                                 |                                         |
| <b>Supplementation</b>                                           |                                                                   |                                                 |                                         |
| Calcium supplement                                               | <input type="checkbox"/> None                                     | <input type="checkbox"/> <500 mg/day            | <input type="checkbox"/> 500-600 mg/day |
|                                                                  | <input type="checkbox"/> 601-1199 mg/day                          | <input type="checkbox"/> ≥1200 mg/day           |                                         |
| Vitamin D supplement                                             | <input type="checkbox"/> None                                     | <input type="checkbox"/> <2800 IU/week          |                                         |
|                                                                  | <input type="checkbox"/> 2800-5599 IU/week                        | <input type="checkbox"/> ≥5600 IU/week          |                                         |
| Other (please specify): _____                                    |                                                                   | Dose: _____                                     |                                         |

Follow-up appointment scheduled: ☐ Yes ☐ No

1. Siminoski K et al. Can Assoc Radiol J 2005; 56:178-88.

2. Ontario Ministry of Health and Long-Term Care. Schedule of Benefits for Laboratory Services [Online]. 2007.

[cited 2008 October 23]. Available from: [http://www.health.gov.on.ca/english/providers/program/ohip/sob/lab/lab\\_services\\_sched\\_01\\_19990401.pdf](http://www.health.gov.on.ca/english/providers/program/ohip/sob/lab/lab_services_sched_01_19990401.pdf).

3. International Society for Clinical Densitometry. Canadian Physician Pocket Guide to BMD Testing [Online]. 2004 [cited 2008 May 26]. Available from: <http://www.iscd.org/Visitors/pdfs/ISCD-CANADIANPanelOfficialPositions-BMDcard.pdf>.

4. Grant WB, Holick MF. Altern Med Rev 2005; 10:94-111.
